# Supplementary material for: A mathematical model as a tool to identify microRNAs with highest impact on transcriptome changes
Source: BMC Genomics. 2019 Feb 6;20:114. doi: 10.1186/s12864-019-5464-0 (PMC6366035; doi:10.1186/s12864-019-5464-0)
Supplement: Supplementary file 1 — Table S1. Summary of dataset at our disposal downloaded from ArrayExpress database. Table includes information about tissue and cell names, experimental settings and microarray platform and ID numbers of individual experiments. (XLSX 10 kb) [file 12864_2019_5464_MOESM1_ESM.xlsx]

## Sheet: Arkusz1
Experiment_ID	Experiment_title	platform_name	platform_id	platform_type	tissue	cell lines	doses [Gy]	ctrl_times [h]	ir_times [h]	miRNA experiment
E-GEOD-55954	Ionizing Radiation Induced micro RNA Expression Alterations in Human Peripheral Blood Mononuclear Cells	Agilent-031181 Unrestricted_Human_miRNA_V16.0_Microarray (miRBase release 16.0 miRNA ID version)	A-GEOD-16770	microRNA	peripheral blood	Patients	0; 60	0; 2; 4; 20	2; 4; 20
E-GEOD-56824	Differential Expression of Stress and Immune Response Pathway Transcripts and miRNAs in Normal Human Endothelial Cells Subjected to Fractionated or Single-Dose Radiation [miRNA]	Agilent-021827 Human miRNA Microarray (V3) (Probe Name version)	A-GEOD-13264	microRNA	Endothelial cells	Patients	0; 10	6; 24	6; 24
E-GEOD-59862	microRNA expression data from AG 1522 human fibroblasts post X-ray radiation	Agilent-046064 Unrestricted_Human_miRNA_V19.0_Microarray (miRNA ID version)	A-GEOD-18402	microRNA	Skin	AG1522	0; 0,05; 2	0	12; 24
E-MEXP-3366	Unraveling the global microRNAome responses to ionizing radiation in human embryonic stem cells	3D-Gene Human miRNA Oligo chip V15.0	A-MEXP-2099	microRNA	Embryonic Stem Cells	H1-hESC; H9	0; 1	2; 16	2; 16
E-GEOD-36720	mRNA expession profiles in prostate carcinoma cells	GE Healthcare CodeLink Human Whole Genome Bioarray	A-GEOD-6248	mRNA	Prostate cancer	DU145; LNCAP; PC3	0; 10; 5	0	2; 6; 24	E-MTAB-327
E-GEOD-37668	Time-varying expression data from WI38 cell lines that were exposed to a challenge dose with or without a priming dose	Affymetrix GeneChip Human Gene 1.0 ST Array [HuGene-1_0-st-v1]	A-AFFY-141	mRNA	fibroblasts	WI38	0; 2	0; 4	1; 2; 4; 8	E-GEOD-12450
E-GEOD-55953	Ionizing Radiation Induced Gene Expression Alterations in Human Peripheral Blood Mononuclear Cells	Agilent-028004 SurePrint G3 Human GE 8x60K Microarray (Probe Name Version)	A-GEOD-14550	mRNA	peripheral blood	Patients	0; 60	0; 2; 4; 20	2; 4; 20
E-GEOD-57059	Differential Expression of Stress and Immune Response Pathway Transcripts and miRNAs in Normal Human Endothelial Cells Subjected to Fractionated or Single-Dose Radiation [mRNA]	Agilent-026652 Whole Human Genome Microarray 4x44K v2 (Probe Name version)	A-GEOD-13497	mRNA	Endothelial cells	Patients	0; 10	6; 24	6; 24
E-GEOD-59861	mRNA Expression data from AG 1522 human fibroblasts post X-ray radiation	GeneChip® PrimeView™ Human Gene Expression Array (with External spike-in RNAs)	A-GEOD-16043	mRNA	Skin	AG1522	0; 0,05; 2	0	3; 6; 12; 24
E-MEXP-2177	Transcription profiling by array of human MOLT4 cells after gamma irradiation and treatment with (E)3-[(4-Methylphenyl)sulfonyl]-2-propenenitrile	Affymetrix GeneChip Human Genome U133A 2.0 [HG-U133A_2]	A-AFFY-37	mRNA	Acute lymphoblastic leukemia	MOLT4	0; 4	2	2	E-MTAB-327
E-MEXP-549	Transcription profiling by array of irradiated human MOLT4 cells	Affymetrix GeneChip Human Genome HG-U133A [HG-U133A]	A-AFFY-33	mRNA	Acute lymphoblastic leukemia	MOLT4	0; 5	0	2; 4; 6; 8; 10; 12	E-MTAB-327
